# Supplementary material for: High-efficiency/CRI/color stability warm white organic light-emitting diodes by incorporating ultrathin phosphorescence layers in a blue fluorescence layer
Source: publisher site journal article supplement (doi:10.1515/nanoph-2017-0021), 2017-07-22
Supplement: Supplementary file 1 [file nanoph-2017-0021_suppl.docx]

**High efficiency/CRI/color stability warm white organic light-emitting diodes by incorporating ultrathin (< 0.1 nm) phosphorescence layers in a blue fluorescence layer**

Yanqin Miao*,†, Kexiang Wang†, Bo Zhao†, Long Gao†, Peng Tao†, Xuguang Liu‡, Yuying Hao§, Hua Wang*,†, Bingshe Xu†, Furong Zhu*,∥

*† Key Laboratory of Interface Science and Engineering in Advanced Materials of Ministry of Education, Research Center of Advanced Materials Science and Technology, Taiyuan University of Technology, Taiyuan, 030024, PR China*

*‡ College of Chemistry and Chemical Engineering, Taiyuan University of Technology, Taiyuan, 030024, PR China*

*§ Key Laboratory of Advanced Transducers and Intelligent Control System of Ministry of Education, College of Physics and Optoelectronics, Taiyuan University of Technology, Taiyuan 030024, PR China*

*∥ Department of Physics, Institute of Advanced Materials, and Institute of Research and Continuing Education (Shenzhen), Hong Kong Baptist University, Kowloon Tong, NT, Hong Kong, PR China*

** Corresponding authors: E-mails:* [*miaoyanqin@tyut.edu.cn (Yanqin*](mailto:miaoyanqin@tyut.edu.cn%20(Yanqin) *Miao),* [*wanghua001@tyut.edu.cn*](mailto:wanghua001@tyut.edu.cn) *(Hua Wang),* [*frzhu@hkbu.edu.hk(Furong*](mailto:frzhu@hkbu.edu.hk(Furong) *Zhu).*


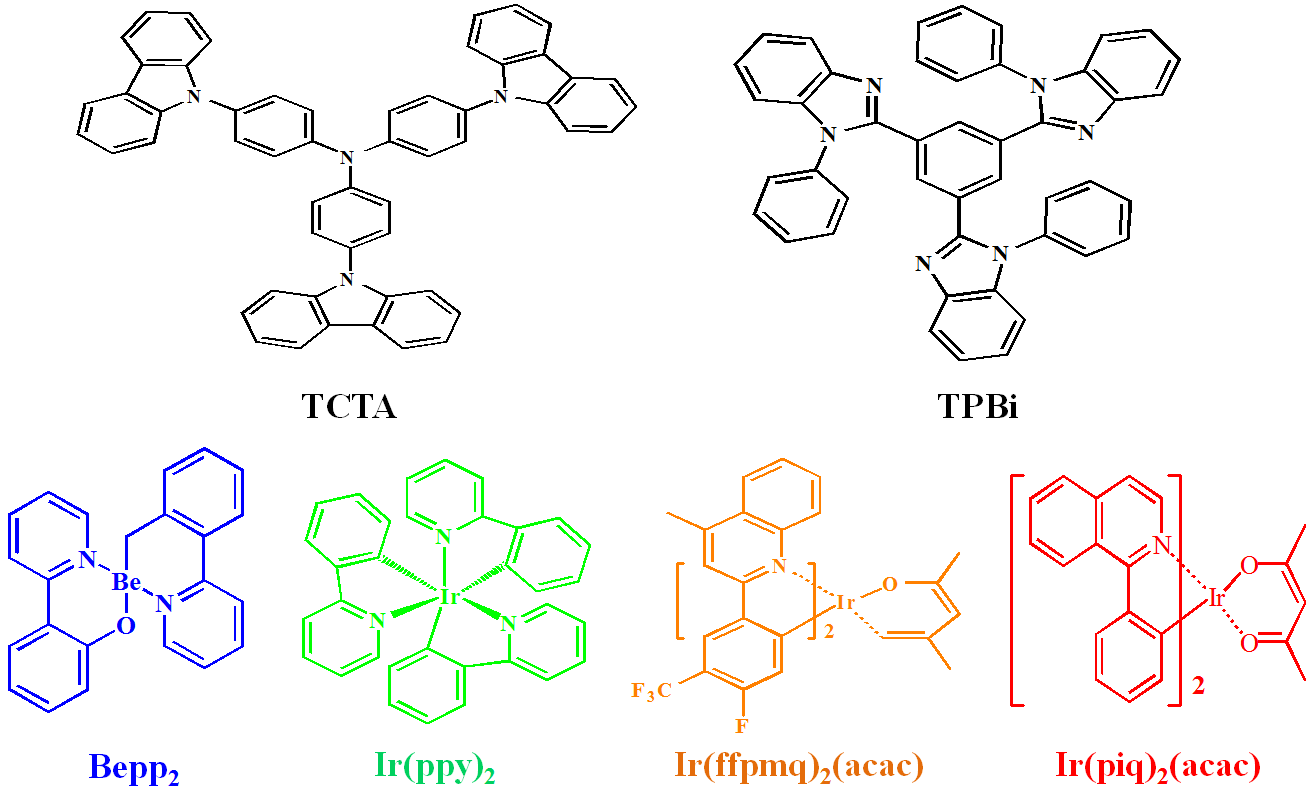


**Figure S1.** The molecular structures of organic materials used for white devices in this work.
